# Supplementary material for: Self-activation for activated carbon from biomass: theory and parameters
Source: Royal Society of Chemistry journal article supplement (doi:10.1039/c5gc02152a), 2015-11-13
Supplement: c5gc02152a1.pdf [file c5gc02152a1.pdf]

## Self-activation for activated carbon from biomass: Theory and parameters

Changlei Xia and Sheldon Q. Shi\*

Department of Mechanical and Energy Engineering, University of North Texas, Denton, TX 76203, USA. E-mail: Sheldon.Shi@unt.edu

### Supplementary Information

#### Proximate and ultimate analysis

Kenaf core and PAC (1,000°C, 10 h) were dried before testing. Volatile matters of kenaf core and PAC (1,000°C, 10 h) were examined in accordance with the procedures described in ASTM E872 and D5832 standards, respectively. Ash contents of kenaf core and PAC (1,000°C, 10 h) were analyzed in accordance with the procedures described in ASTM E1755 and D2866 standards, respectively. The residues of the matters were fixed carbon. Ultimate analysis was performed by a Vario EL III Element Analyzer.

**Table S1.**

Proximate analysis and ultimate analysis of kenaf core and activated carbon through self-activation process.

| Sample              | Proximate analysis (%) |              |       | Ultimate analysis (%) |      |       |      |      |
|---------------------|------------------------|--------------|-------|-----------------------|------|-------|------|------|
|                     | Volatile matter        | Fixed carbon | Ash   | C                     | H    | O     | N    | S    |
| Kenaf core          | 82.85                  | 15.41        | 1.74  | 48.00                 | 6.37 | 42.10 | 0.35 | 0.07 |
| PAC (1,000°C, 10 h) | 0.68                   | 80.47        | 18.85 | 92.14                 | 0.54 | 0.12  | 0.16 | 0.02 |

## Mass spectrometry

Mass spectrometry (MS) analysis was performed by Inficon CPM residual gas analyzer (RGA). After the self-activation of kenaf core at 1,000°C for 30 h (cooling down to room temperature), the gas sample was collected in a bag from the furnace by a 1-liter Tedlar bag (Zefon International Inc., USA) for analysis.

Fig. S1 shows the MS of emitted gases from self-activation of kenaf core, with the possible components, including H<sub>2</sub>, CO<sub>2</sub>, CO, H<sub>2</sub>O, CH<sub>4</sub>, etc. In Fig. S1, it showed that the H<sub>2</sub> amount was very little. This could be due to that some H<sub>2</sub> was diffused out through the Tedlar bag. The m/z peaks shown in Fig. S1 at 12, 28, and 32 (C, CO, O<sub>2</sub>) would have included those decomposed from CO<sub>2</sub>, since the electron ionization was used.

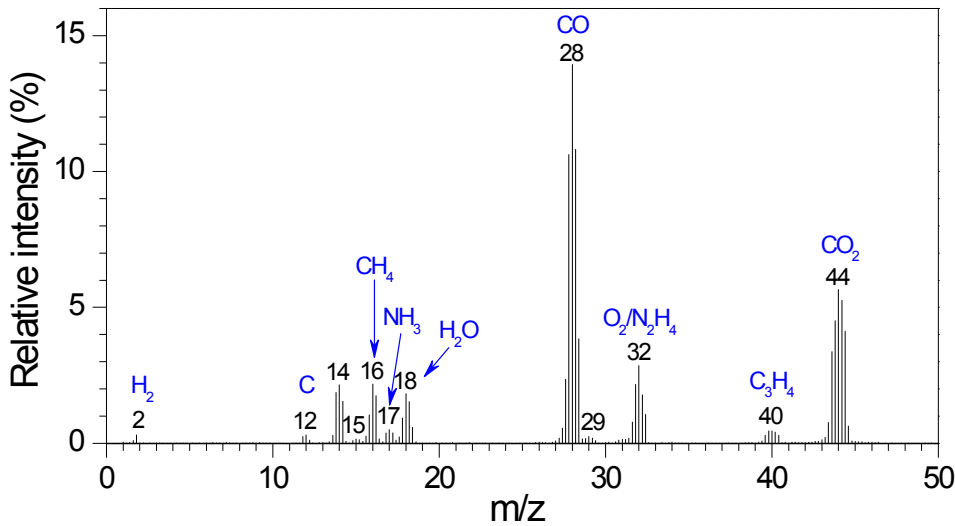

**Fig. S1.** Mass spectrometry of the emitted gases from the self-activation of kenaf core at 1,000°C for 30 h.

## Fourier transform infrared spectroscopy

Fourier transform infrared spectroscopy (FT-IR) was carried out by a Thermo-Fisher Nicolet 6700 FTIR analyzer, employing a 20-mL Pike flow cell. Two gas samples were collected by 1-liter Tedlar bags, including the emitted gases after the self-activation processes at 1,000°C for 2 h and 30 h, respectively.

FT-IR was employed to examine the concentration changes of CO<sub>2</sub> and CO during the time (Fig. S2 and Table S2). The peaks at 2360 and 2341 cm<sup>-1</sup> belong to CO<sub>2</sub>, and those at 2171 and 2117 cm<sup>-1</sup> are attributed to CO.<sup>1</sup> Comparing the gas components from self-activation at 1000°C for 2 h with those for 30 h, the CO/CO<sub>2</sub> ratio was increased by 128.8%, indicating that the CO<sub>2</sub> was reacted with C to generate CO with an increase of self-activation time.

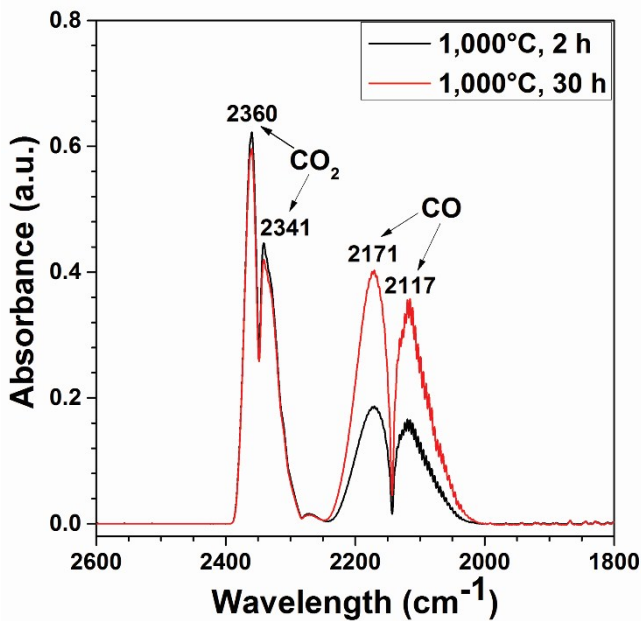

Fig. S2. FT-IR absorbance of the emitted gases from self-activation processes at 1,000°C for 2 h and 30 h.

Table S2.

FT-IR absorbance of CO<sub>2</sub> and CO in the emitted gases after self-activation processes at 1,000°C for 2 h and 30 h.

| Parameter                 | FT-IR absorbance (a.u.) <sup>a</sup> |                       |                       |                       | Value of CO/CO <sub>2</sub> |
|---------------------------|--------------------------------------|-----------------------|-----------------------|-----------------------|-----------------------------|
|                           | CO <sub>2</sub>                      |                       | CO                    |                       |                             |
|                           | 2360 cm <sup>-1</sup>                | 2341 cm <sup>-1</sup> | 2171 cm <sup>-1</sup> | 2117 cm <sup>-1</sup> |                             |
| 1,000°C, 2 h              | 0.622                                | 0.446                 | 0.185                 | 0.156                 | 0.319                       |
| 1,000°C, 30 h             | 0.596                                | 0.420                 | 0.400                 | 0.342                 | 0.730                       |
| Increase (%) <sup>b</sup> | -                                    | -                     | -                     | -                     | 128.8                       |

<sup>a</sup> The four wavelengths are corresponding to the peaks in Fig. S2;

<sup>b</sup> The increase of CO/CO<sub>2</sub> ratio from “1,000°C, 2 h” to “1,000°C, 30 h”.

## Reference

- 1 H. Yang, R. Yan, H. Chen, D. H. Lee and C. Zheng, *Fuel*, 2007, **86**, 1781–1788.
